# Supplementary figures and images for: The microfluidic puzzle: chip-oriented rapid prototyping
Source: Royal Society of Chemistry journal article supplement (doi:10.1039/c3lc51399h), 2014-01-01

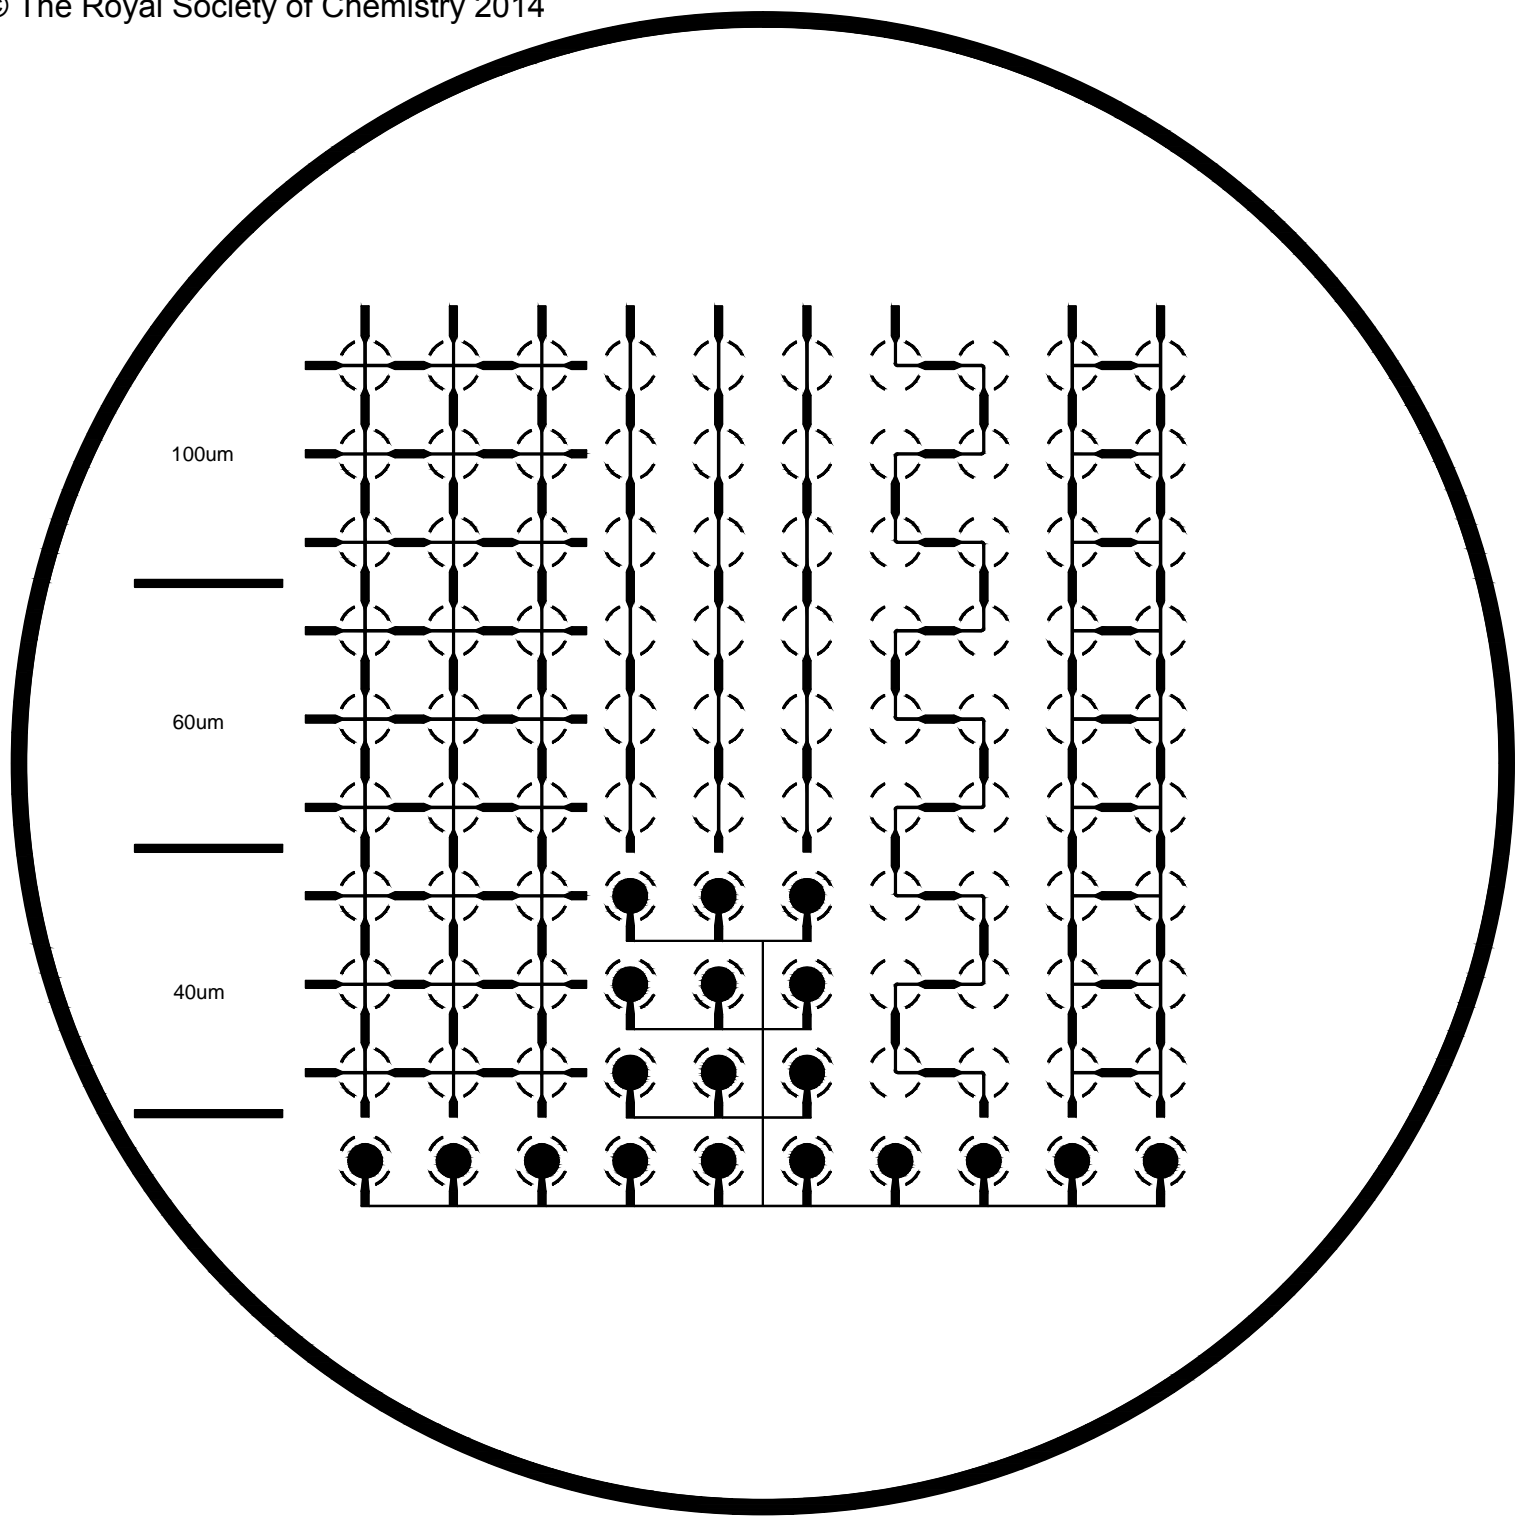

Supplement: c3lc51399h6.pdf [file c3lc51399h6.pdf]
